# Supplementary material for: A facile synthesis of FePS3@C nanocomposites and their enhanced performance in lithium-ion batteries
Source: Royal Society of Chemistry journal article supplement (doi:10.1039/c8dt04866e), 2019-01-01
Supplement: c8dt04866e1.pdf [file c8dt04866e1.pdf]

1 **A facile synthesis of FePS<sub>3</sub>@C nanocomposites and their enhanced performance in**  
2 **lithium-ion batteries**

3 Miao Wang and Kaibin Tang

4

5 Corresponding author: Hefei National Laboratory for Physical Sciences at the Microscale,

6 University of Science and Technology of China, Hefei, 230026, China

7

8 Department of Chemistry, University of Science and Technology of China, Hefei, 230026,

9 China

10

11 E-mail address: kbtang@ustc.edu.cn (K. B. Tang).

12

13

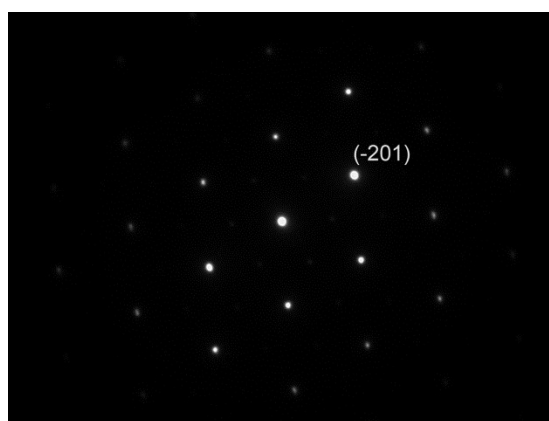

14

15 **Figure S1:** SAED pattern of the FePS<sub>3</sub>@C nanocomposite.

16

17

18 **Fig. S2a** shows that except the peaks of copper foil, Li<sub>2</sub>S was successfully detected

19 after the third discharge to 1 V. Because the metallic Fe nanoparticles are presumably  
20 smaller than the X-ray coherence length, as there are no diffraction peaks [1]. In addition,  
21 we did not detect the presence of  $\text{Li}_3\text{P}$  from XRD. **Fig. S2b** presents an TEM image of  
22 the  $\text{FePS}_3@\text{C}$  electrode at the 3rd discharged state, which shows that the sample  
23 degraded into nano-aggregate. Furthermore, **Fig. S2c** displays the HRTEM image of the  
24  $\text{FePS}_3@\text{C}$  electrode after the 3rd discharged reaction, the lattice fringes is 0.182nm,  
25 which confirms the existence of iron.

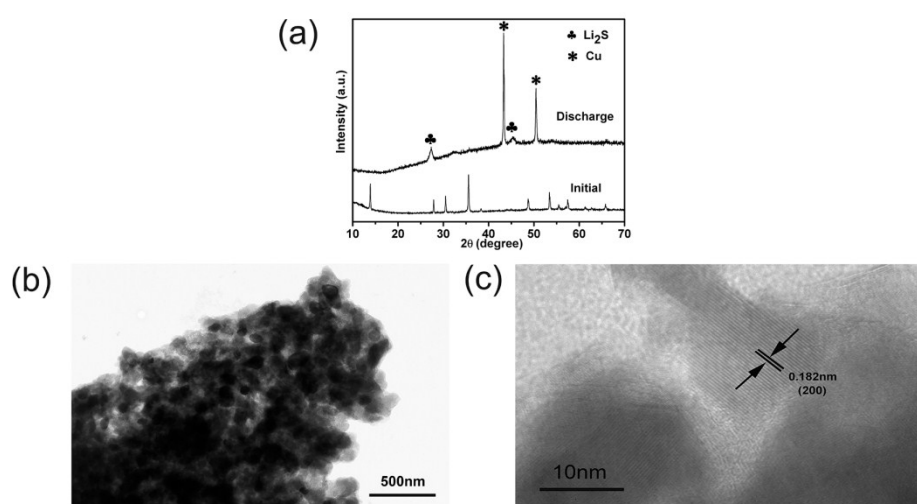

26  
27 **Fig. S2** (a) Cycle testing of an ex situ XRD patterns of the  $\text{FePS}_3@\text{C}$  nanocomposite  
28 electrode. (b) TEM image of the  $\text{FePS}_3@\text{C}$  nanocomposite electrode after 3 cycles at 0.2  
29  $\text{A g}^{-1}$ . (c) HRTEM image of the  $\text{FePS}_3@\text{C}$  nanocomposite electrode after 3 cycles at 0.2  
30  $\text{A g}^{-1}$ .

31

32 Bulk  $\text{FePS}_3$  sample was successfully prepared by a conventional solid state method.  
33 Powders of the elements Fe (99%), red phosphorus (99%) and sublimate sulphur (99%),  
34 in an atomic ratio of Fe : P : S = 1 : 1 : 3 were thoroughly mixed together, then sealed into

35 quartz ampoule evacuated. The ampoule was slowly heated up to 923 K, holding for 24 h.  
 36 Finally, shiny gray-black products for subsequent tests were collected after the furnace  
 37 cooled down to room temperature naturally. All the peaks of powder XRD pattern can be  
 38 well indexed based on a monoclinic-type cell with the space group of C2/m (JCPDS card  
 39 no. 33-0672), indicate the single phase of sample. The SEM image of bulk FePS<sub>3</sub> sample  
 40 shows a typical stacked 2D microstructures. The bulk FePS<sub>3</sub> electrode exhibits capacity  
 41 of about 600 mAh g<sup>-1</sup> over 70 cycles at a current density of 0.2 A g<sup>-1</sup> and capacity of 400  
 42 mAh g<sup>-1</sup> over 80 cycles at 1 A g<sup>-1</sup>, as shown in **Fig S3**(c, d).

43

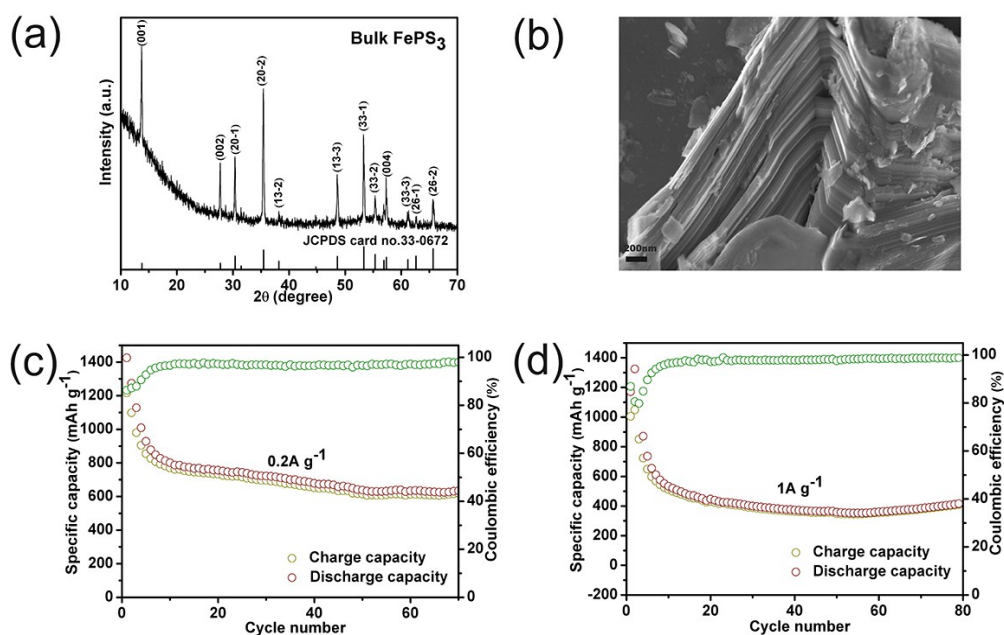

44

45 **Fig. S3** (a) Powder X-ray diffraction pattern of the bulk FePS<sub>3</sub> sample. (b) SEM image of  
 46 bulk FePS<sub>3</sub> sample. (c) Cycling performance and coulombic efficiency (CE) of the bulk  
 47 FePS<sub>3</sub> electrode at a current density of 0.2 A g<sup>-1</sup>. (d) Cycling performance and coulombic  
 48 efficiency (CE) of the bulk FePS<sub>3</sub> electrode at a current density of 1 A g<sup>-1</sup>.

49

50 **References:**

51 [1] P. Poizot, S. Laurelle, S. Greugon, L. Dupont, J. M. Tarascon, Nature 407 (2000) 496.

52
